# Supplementary material
Source: PubMed Central journal article supplement (PMC9628811)
Supplement: NIHMS1844715-supplement-1.pdf [file NIHMS1844715-supplement-1.pdf]

**SUPPLEMENTAL MATERIAL**

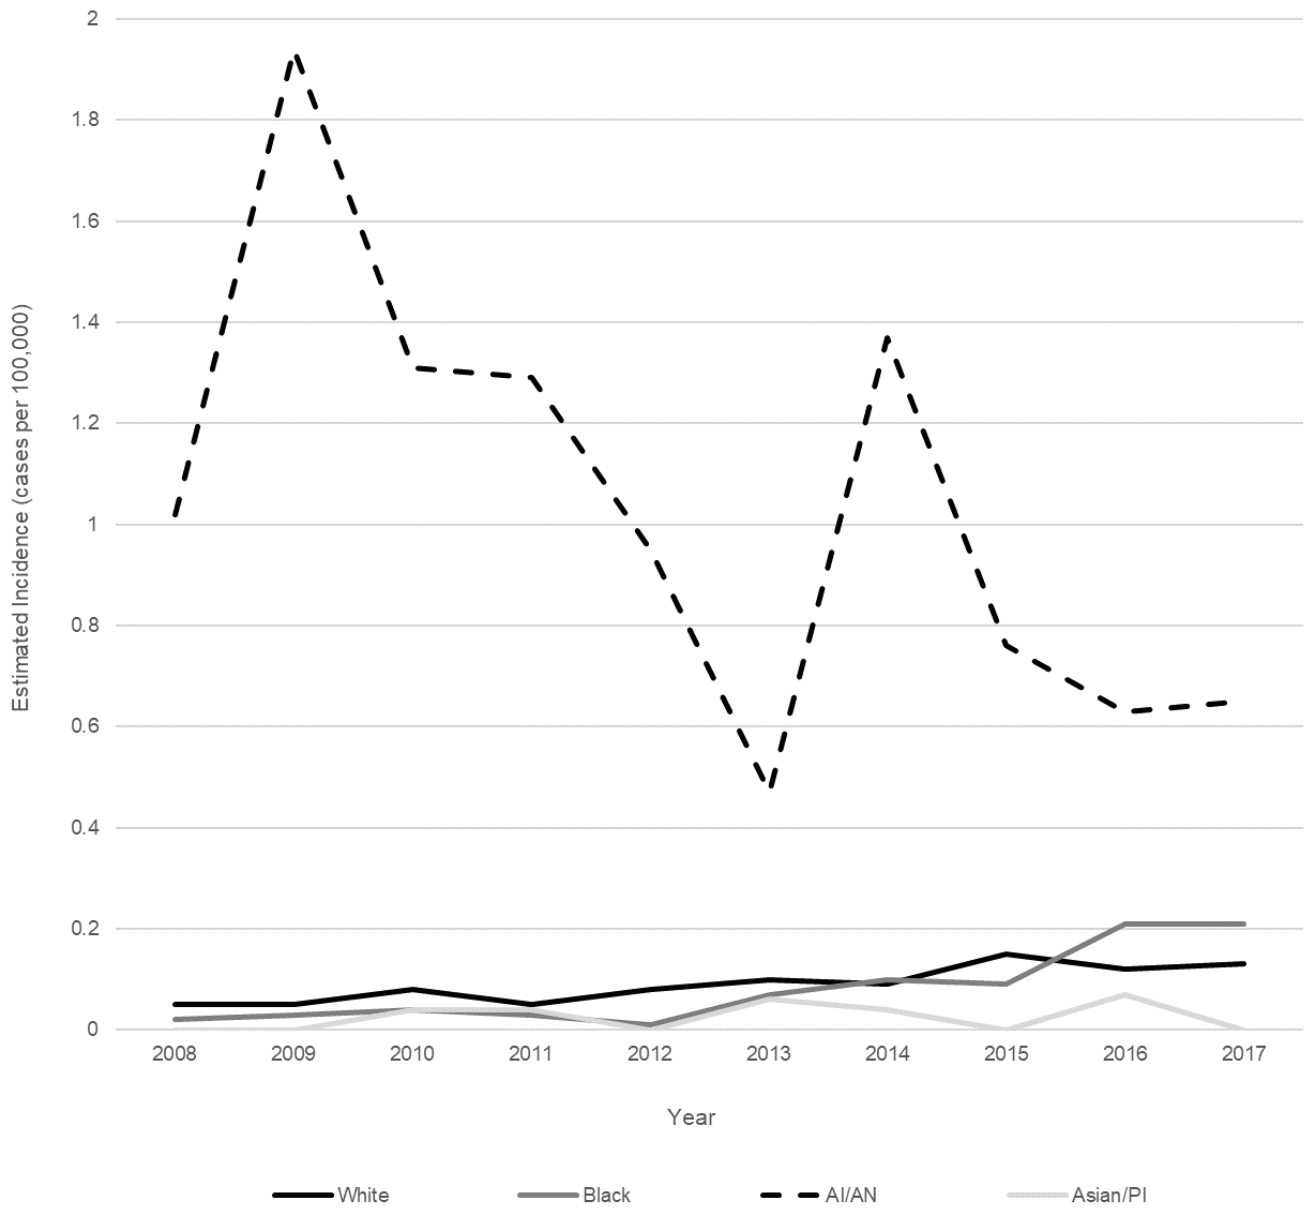

**Supplemental Figure. Trends in incidence of invasive *H. influenzae* serotype a disease, by race—United States, 2008–2017**
